# Supplementary material for: Multiple gold nanorods@hierarchically porous silica nanospheres for efficient multi-drug delivery and photothermal therapy
Source: Royal Society of Chemistry journal article supplement (doi:10.1039/c6tb03020c), 2017-01-01
Supplement: c6tb03020c1.pdf [file c6tb03020c1.pdf]

## **Supporting Information**

### **Multiple gold nanorods@hierarchically porous silica nanospheres for efficient multi-drug delivery and photothermal therapy**

*Nan Li<sup>a</sup>, Dechao Niu<sup>a,\*</sup>, Xiaobo Jia<sup>a</sup>, Jianping He<sup>a</sup>, Yu Jiang<sup>a</sup>, Jinlou Gu<sup>a</sup>, Zheng Li<sup>b</sup>,*

*Shiai Xu<sup>a,b</sup>, Yongsheng Li<sup>a,\*</sup>*

a Laboratory of Low-Dimensional Materials Chemistry, Key Laboratory for Ultrafine Materials  
of Ministry of Education, East China university of Science and Technology, Shanghai 200237,  
China

b School of Chemical Engineering, Qinghai University, Xining 810086, China

*\*Correspondence author:*

*Dechao Niu, dcnium@ecust.edu.cn; Yongsheng Li, yslie@ecust.edu.cn*

Supplementary figures

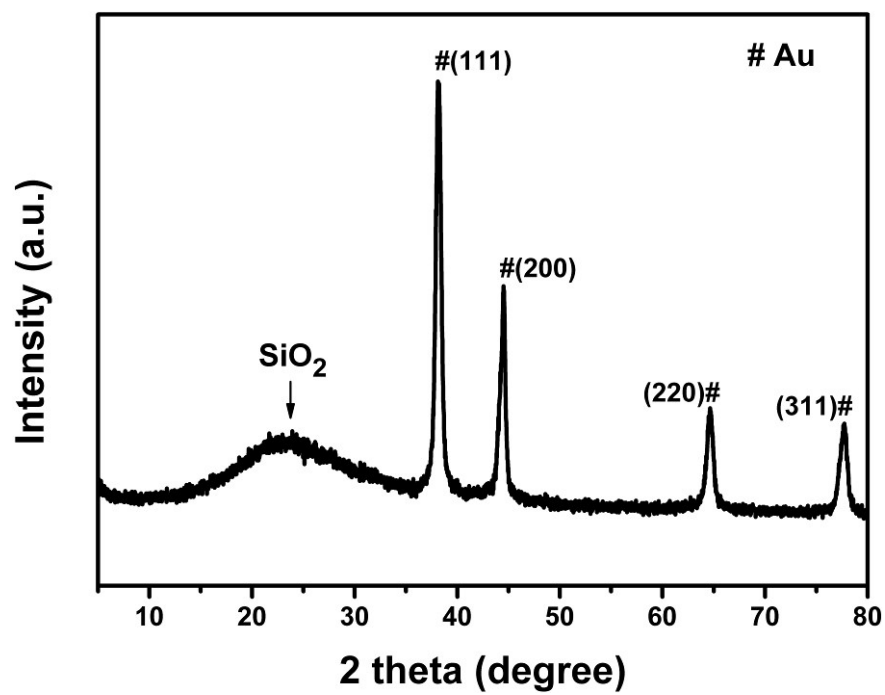

Fig. S1. Wide-angle XRD pattern of MGNRs@HPSNs.

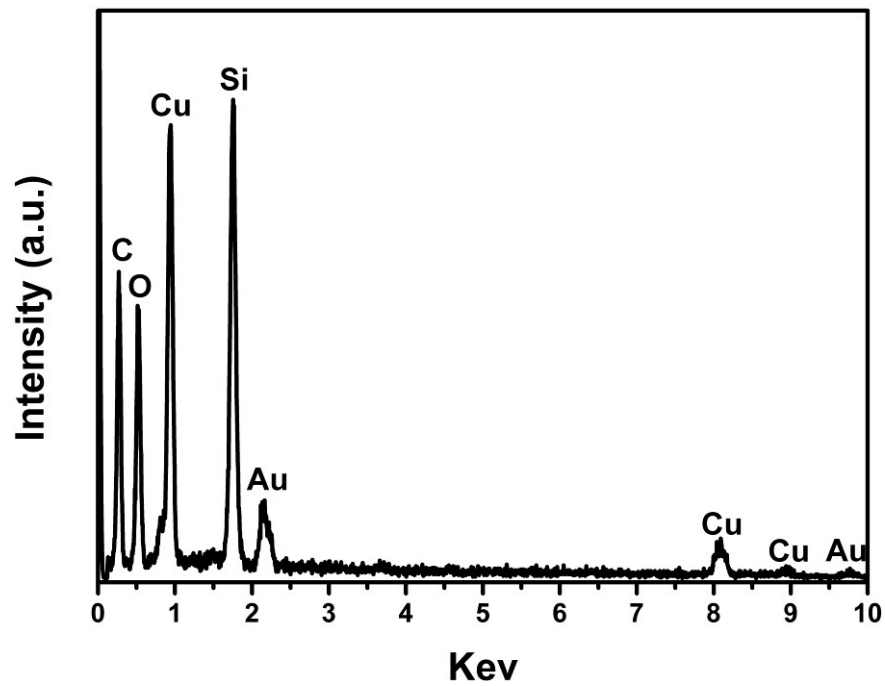

**Fig. S2.** Energy dispersive spectroscopy (EDS) image for MGNRs@HPSNs.

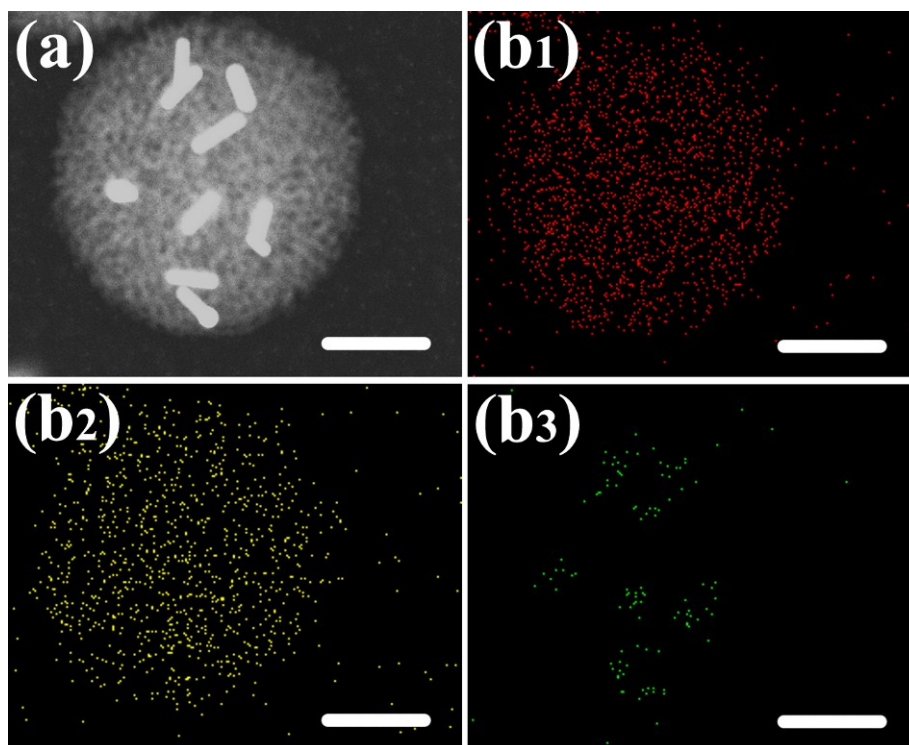

**Fig. S3.** High angle annular dark field scanning transmission electron microscopy (HAADF-STEM) image (a) and corresponding nanoscale elemental mapping of Si (b<sub>1</sub>), O (b<sub>2</sub>) and Au (b<sub>3</sub>) (Scale bar: 100 nm).

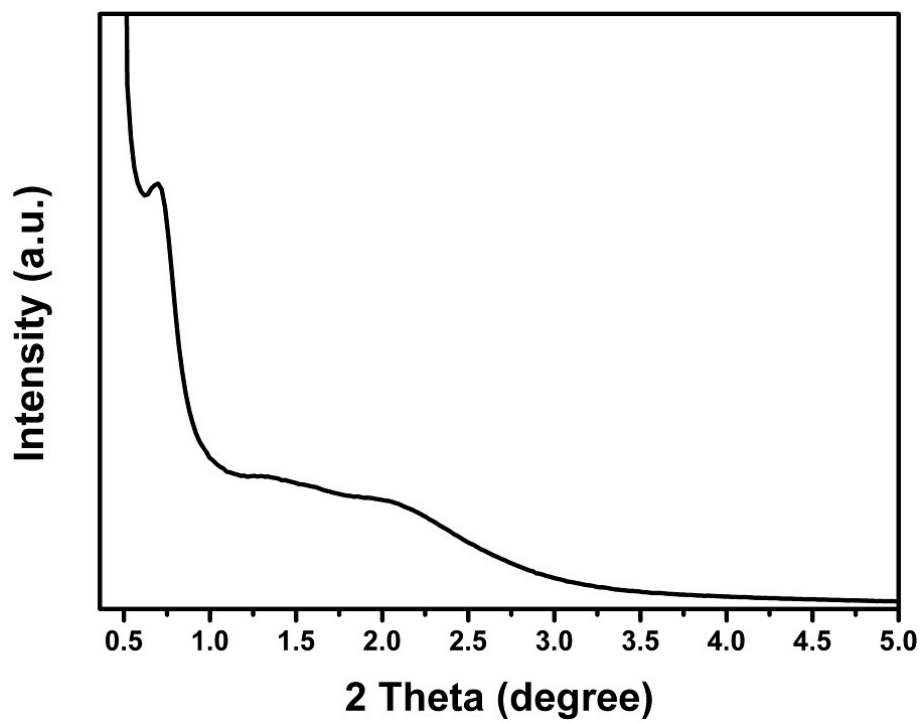

**Fig. S4.** Small-angle XRD pattern of MGNRs@HPSNs.

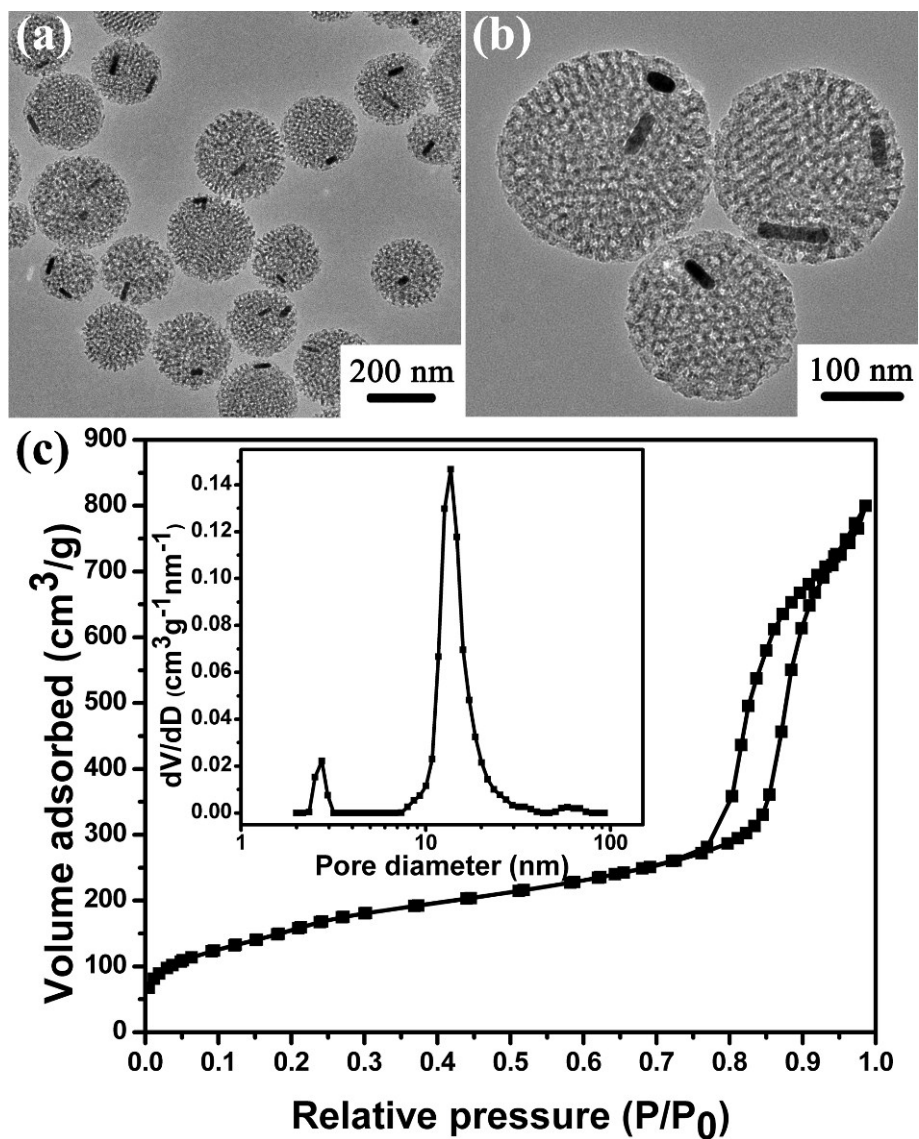

Fig. S5. TEM images of MGNRs@HPSNs-L at different magnifications (a,b) and the corresponding N<sub>2</sub> sorption isotherm (inset: NLDFT pore diameter distribution from the adsorption branch).

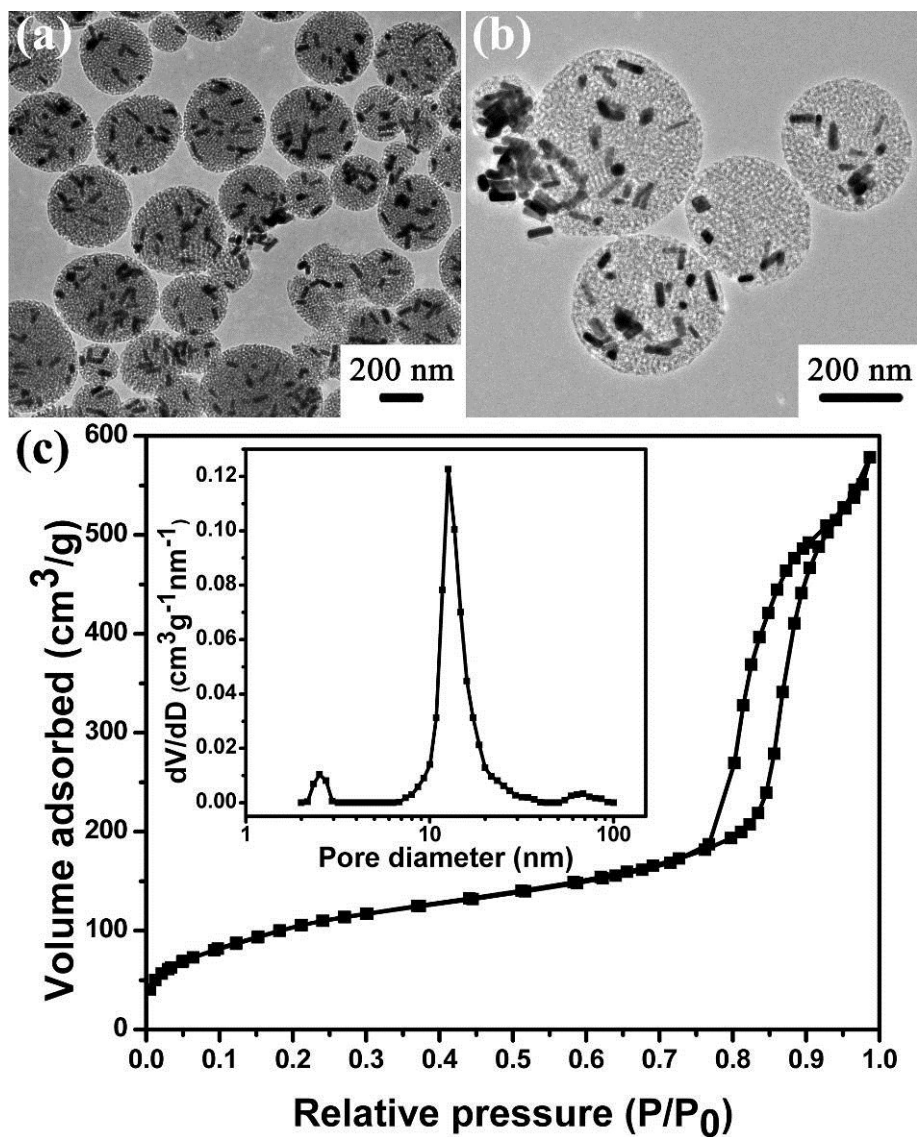

**Fig. S6.** TEM images of MGNRs@HPSNs-H at different magnifications (a,b) and the corresponding N<sub>2</sub> sorption isotherm (inset: NLDFT pore diameter distribution from the adsorption branch).

**Table S1** Pore structural parameters of different samples.

| Samples       | Specific surface area<br>(m <sup>2</sup> /g) | Total pore volume<br>(cm <sup>3</sup> /g) | Small-pore diameter*<br>(nm) | Large-pore diameter*<br>(nm) |
|---------------|----------------------------------------------|-------------------------------------------|------------------------------|------------------------------|
| MGNRs@HPSNs-L | 564.6                                        | 1.24                                      | 2.7                          | 13.6                         |
| MGNRs@HPSNs   | 504.9                                        | 1.11                                      | 2.7                          | 13.2                         |
| MGNRs@HPSNs-H | 372.2                                        | 0.89                                      | 2.6                          | 12.8                         |

\*Pore diameter calculated by NLDFT method on the adsorption isotherm.



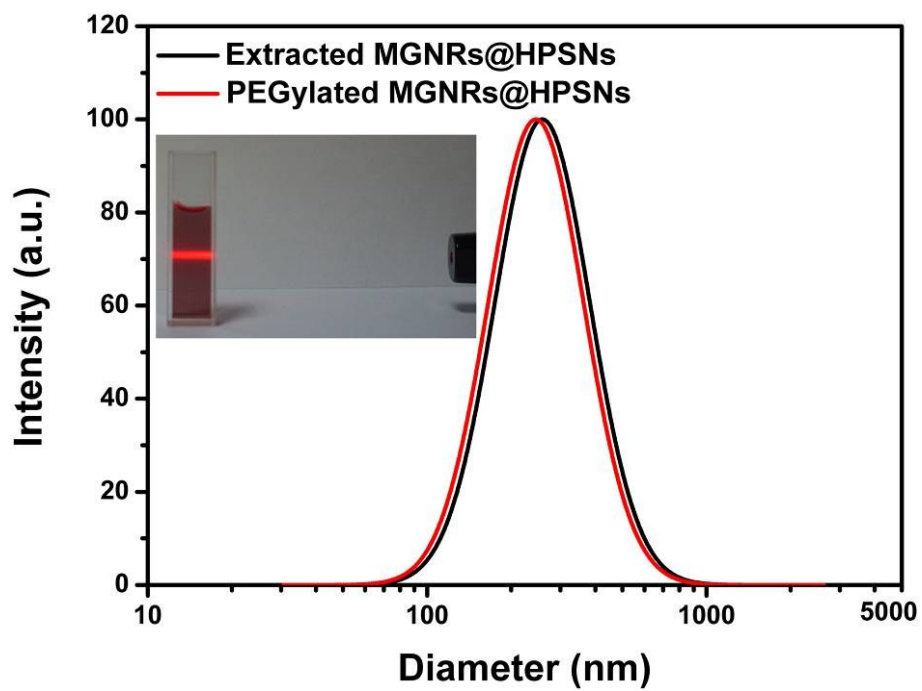

**Fig. S7.** Hydrodynamic diameter of different nanoparticles by DLS technique in water (inset: optical image for PEGylated MGNRs@HPSNs with laser).

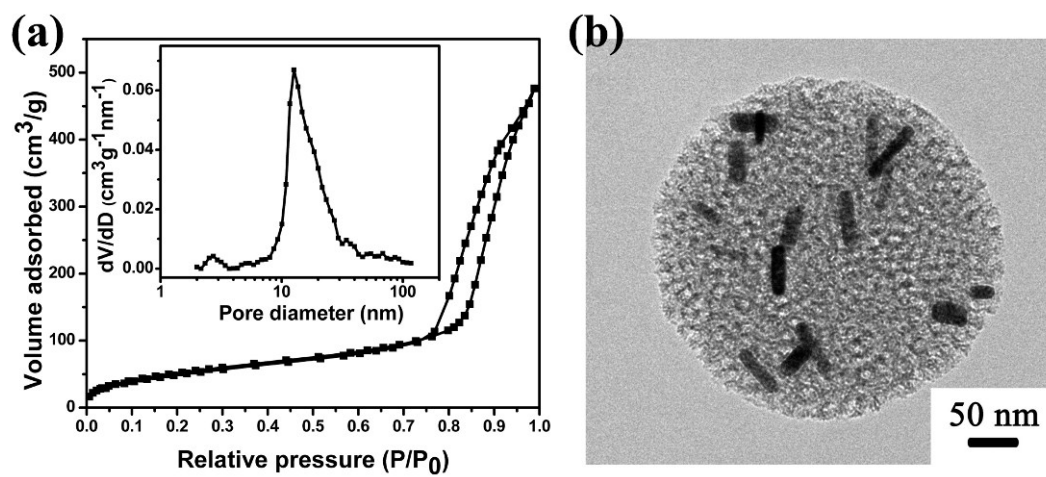

**Fig. S8.** N<sub>2</sub> sorption isotherm (a) and corresponding TEM image (b) of PEGylated MGNRs@HPSNs (inset: NLDFT pore diameter distribution from the adsorption branch).

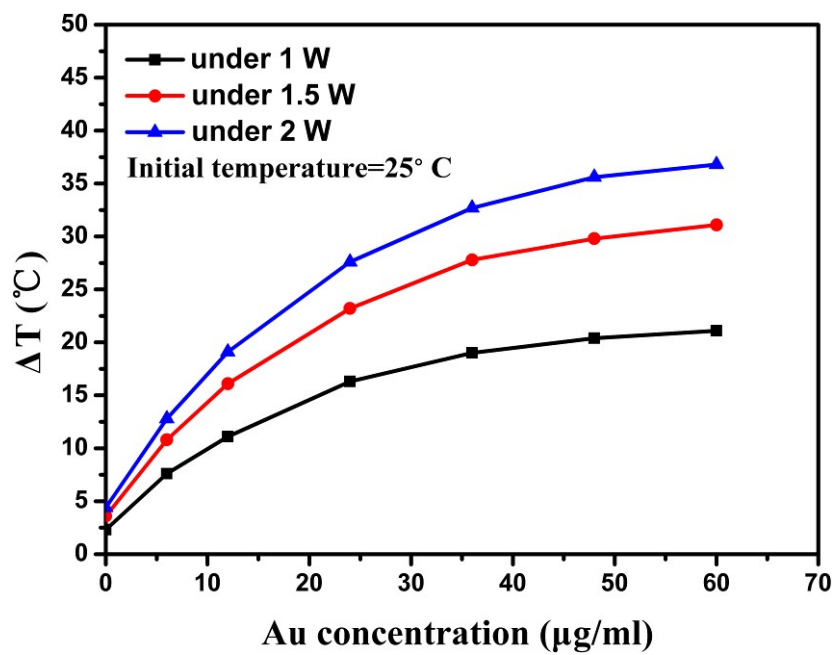

**Fig. S9.** Temperature profiles of the aqueous solutions of PEGylated MGNRs@HPSNs with laser irradiation of different powers for 5 min.

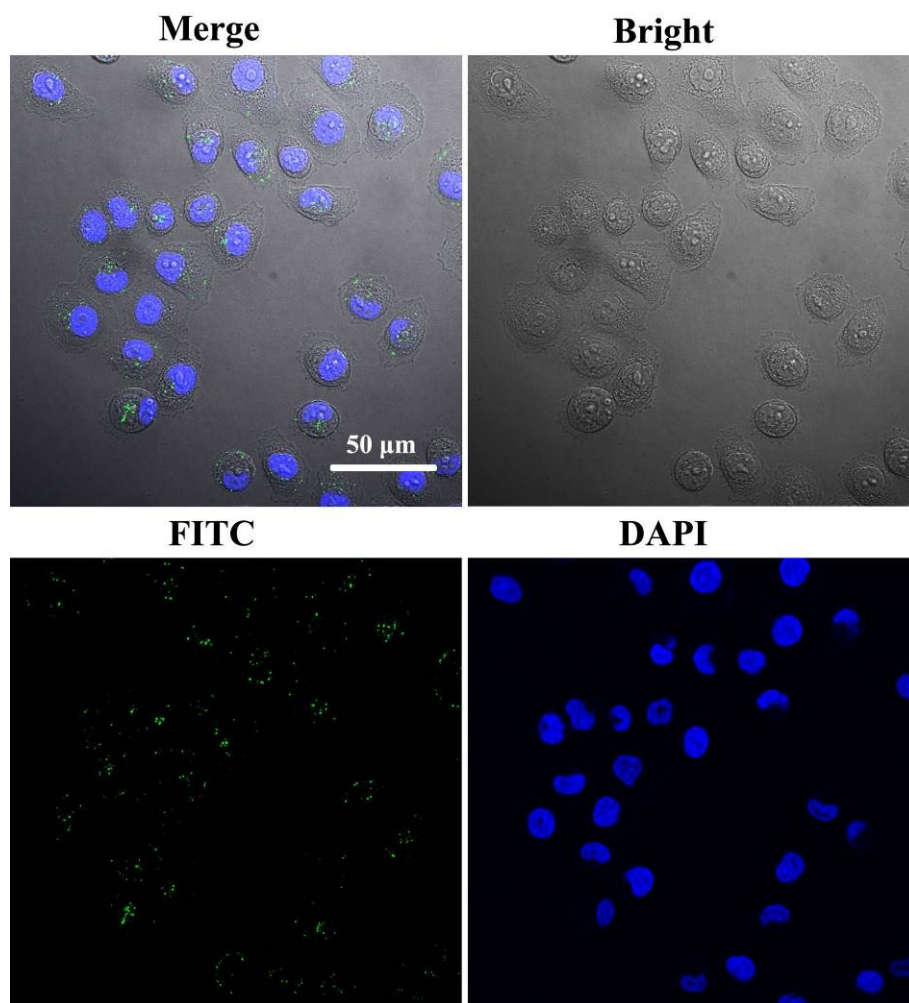

**Fig. S10.** The confocal laser scanning microscope (CLSM) images of SMMC-7721 cells after incubation for 4 h with the PEGylated MGNRs@HPSNs grafted with fluorescein isothiocyanate (FITC) groups.
